# Supplementary material
Source: Copernicus journal article supplement (doi:10.5194/ascmo-12-195-2026)
Supplement: Supplementary file 1 [file ascmo-12-195-2026-supplement.pdf]

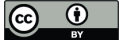

*Supplement of*

## **Non-stationary GEV models for estimating design sea-states in a changing climate – applications to offshore wind farms along the French coasts**

**Nicolas Raillard et al.**

*Correspondence to:* Nicolas Raillard ([nicolas.raillard@ifremer.fr](mailto:nicolas.raillard@ifremer.fr))

The copyright of individual parts of the supplement might differ from the article licence.

# S1 Monthly quantiles at SRPs

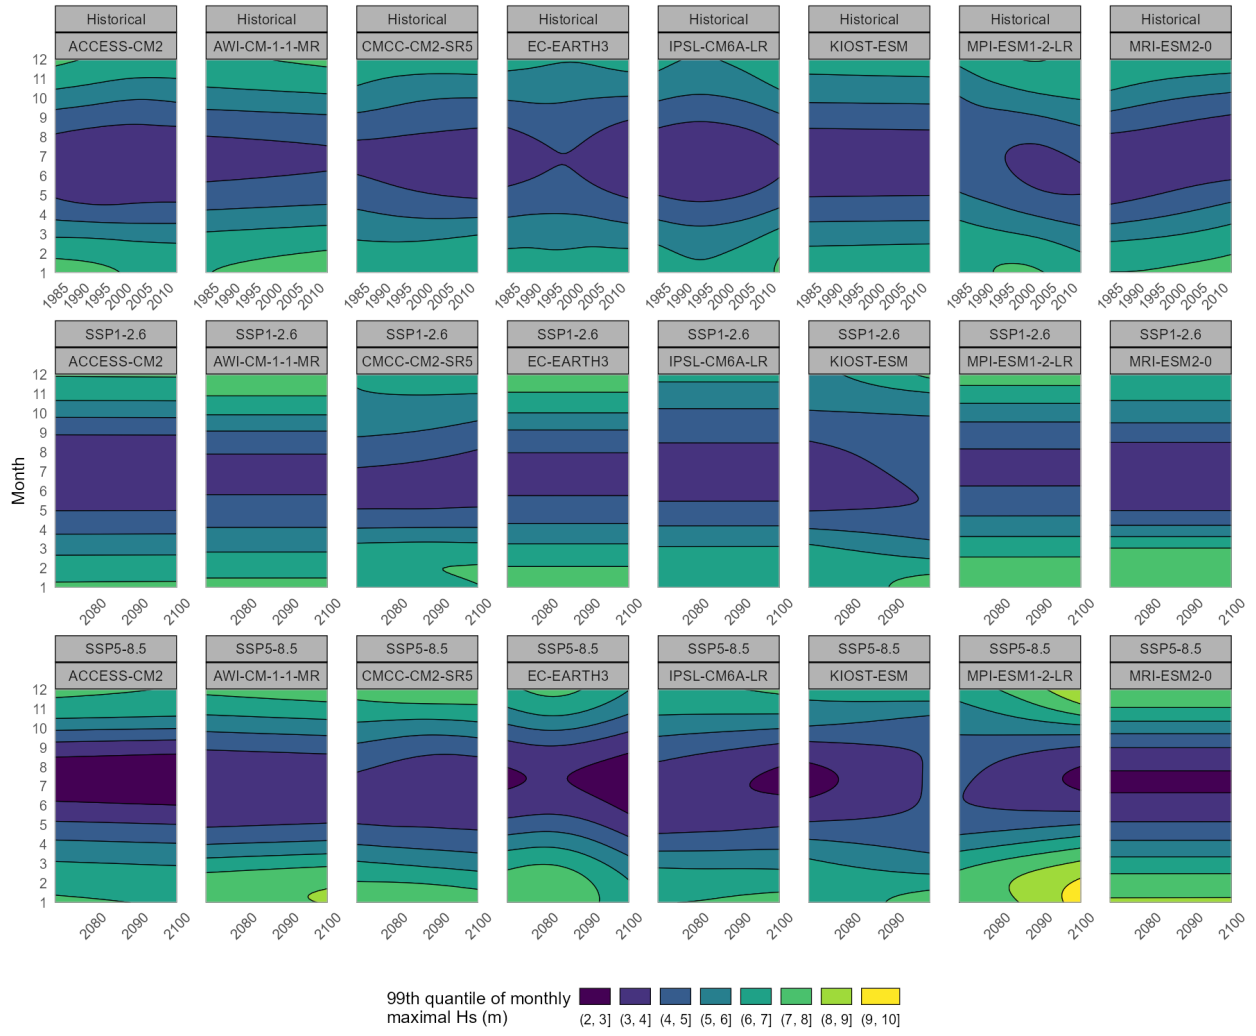

Figure S1: Comparison of monthly 99th quantile, at the West English Channel Representative point

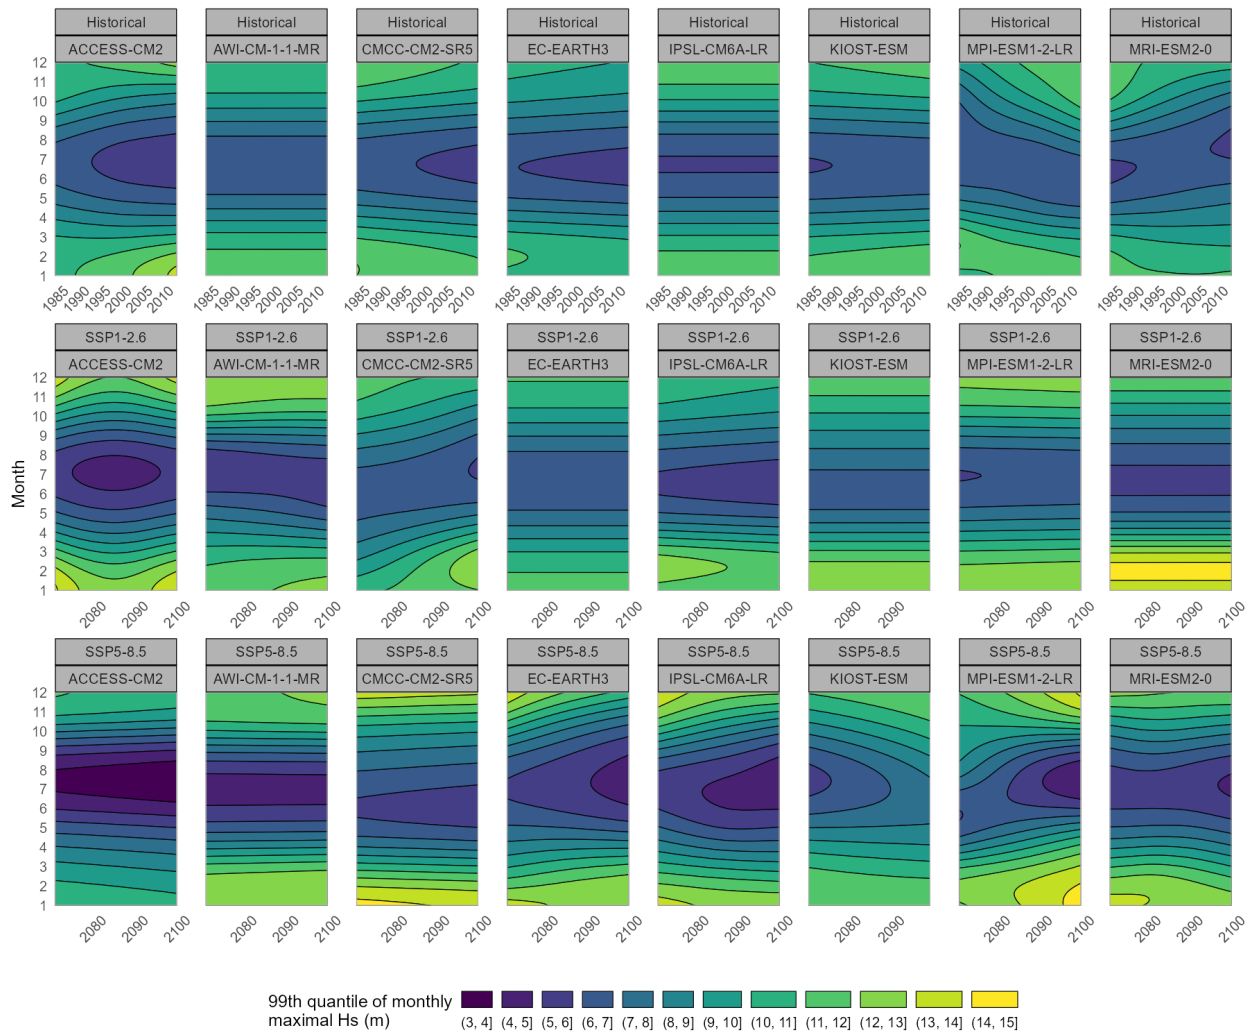

Figure S2: Comparison of monthly 99th quantile, at the North Atlantic Representative point

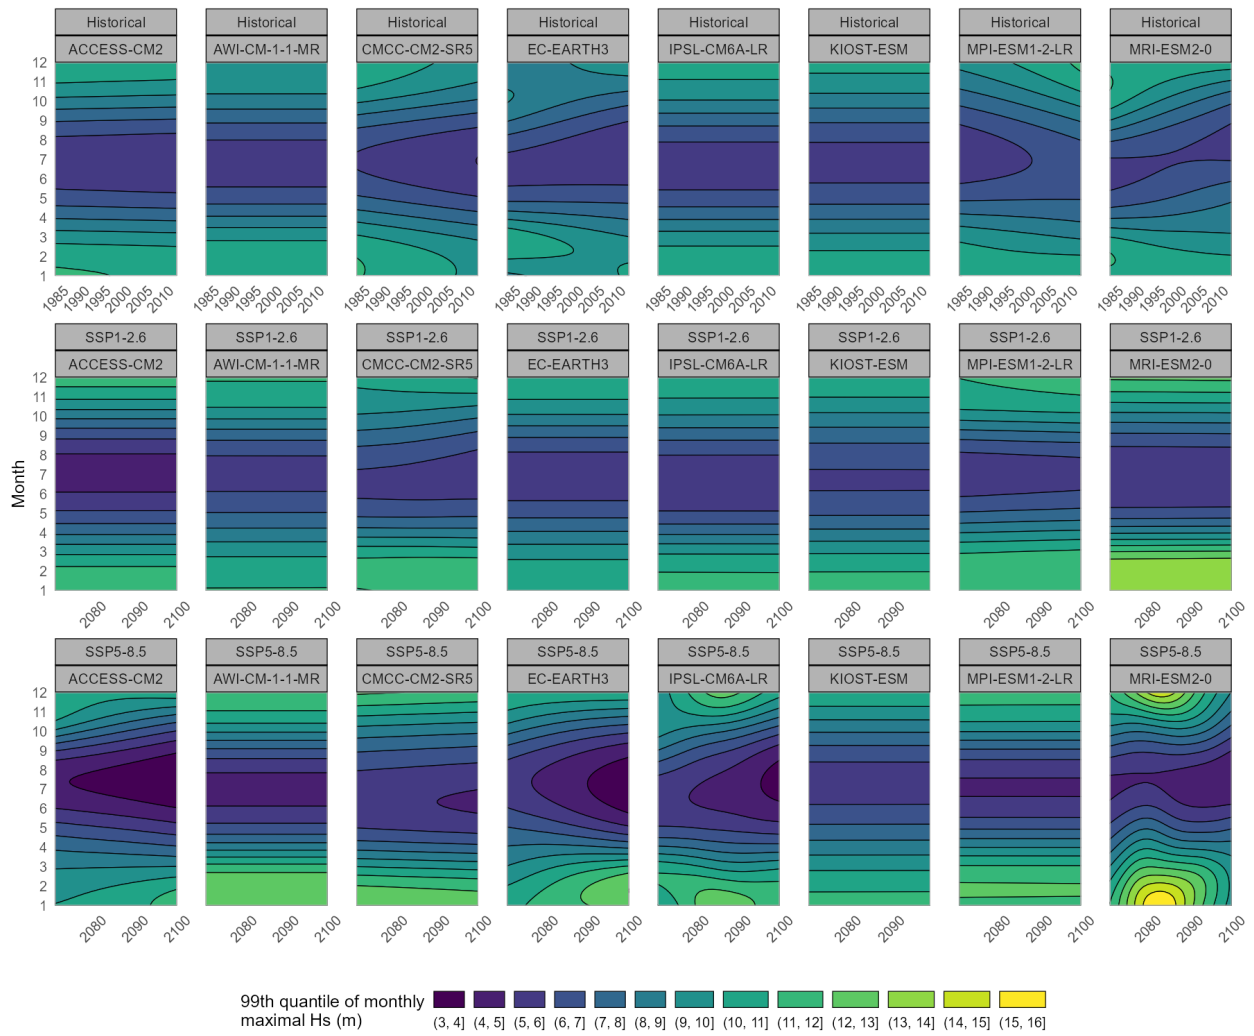

Figure S3: Comparison of monthly 99th quantile, at the South Atlantic Representative point

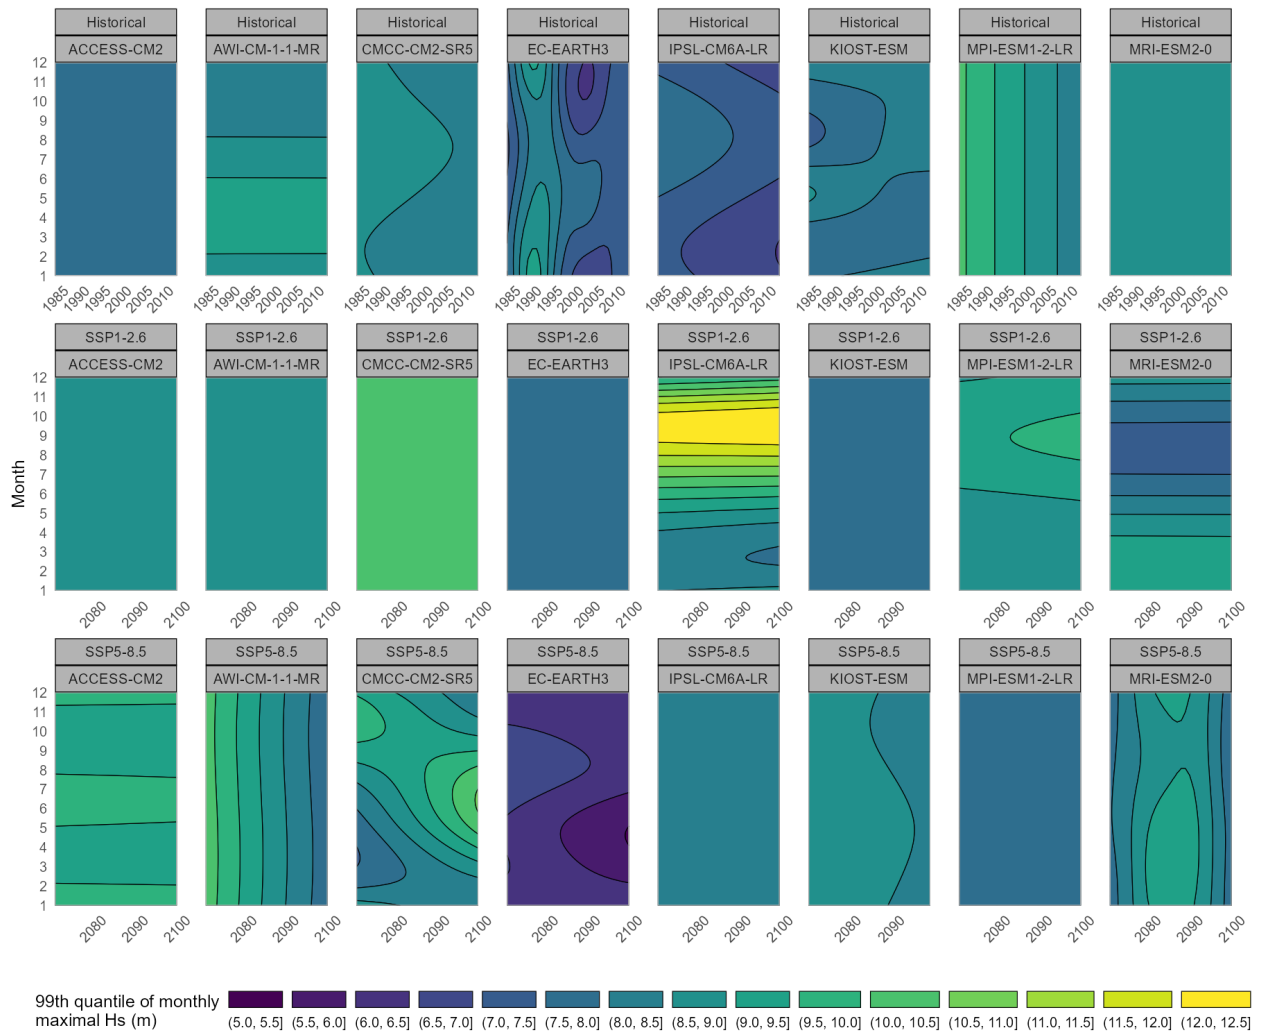

Figure S4: Comparison of monthly 99th quantile, at the West Mediterranean Representative point

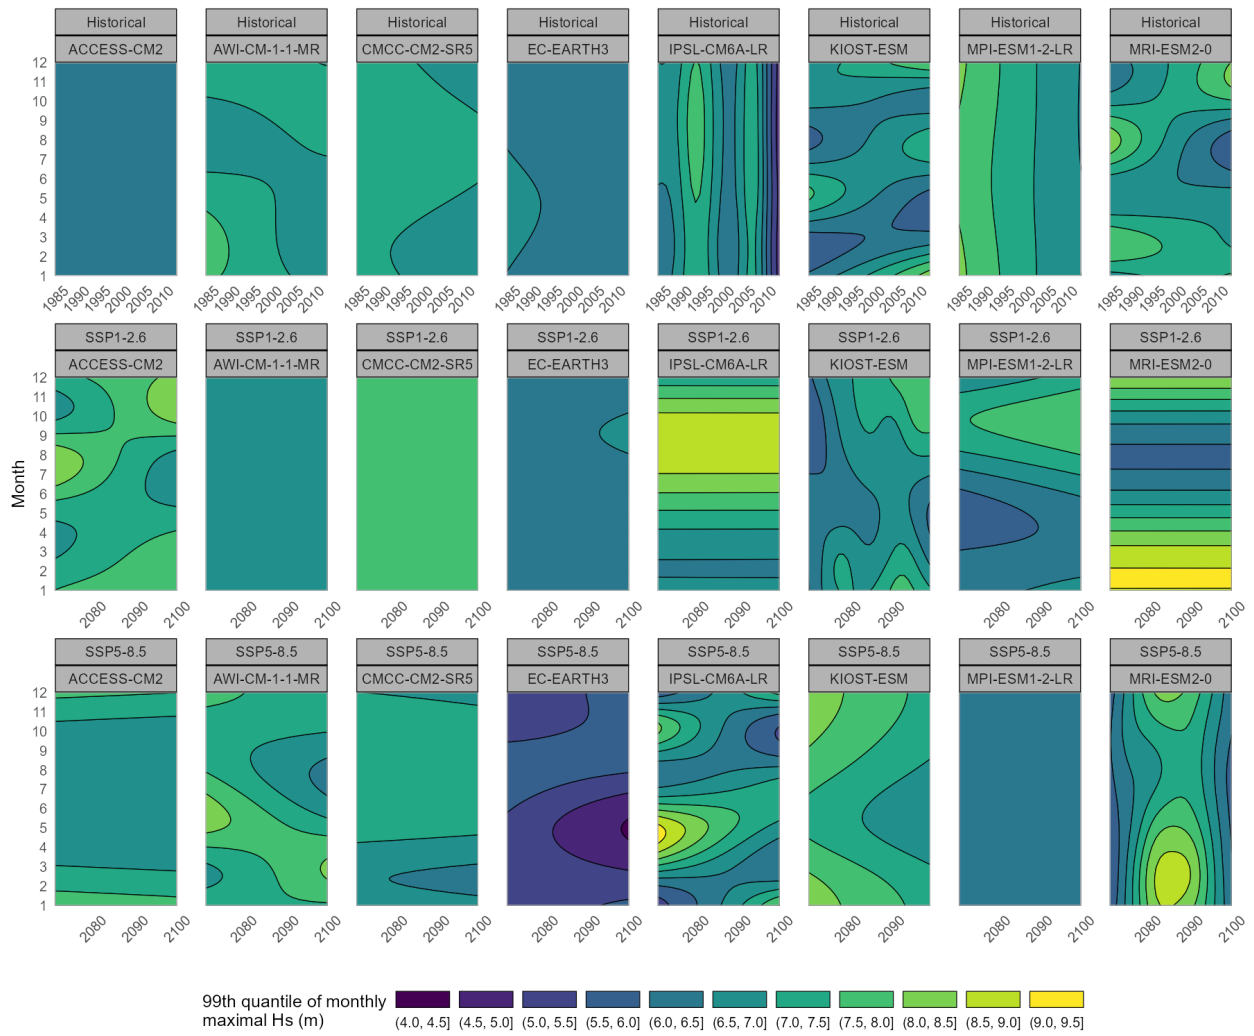

Figure S5: Comparison of monthly 99th quantile, at the East Mediterranean Representative point

## S2 Comparison of monthly quantiles at SRPs for given years

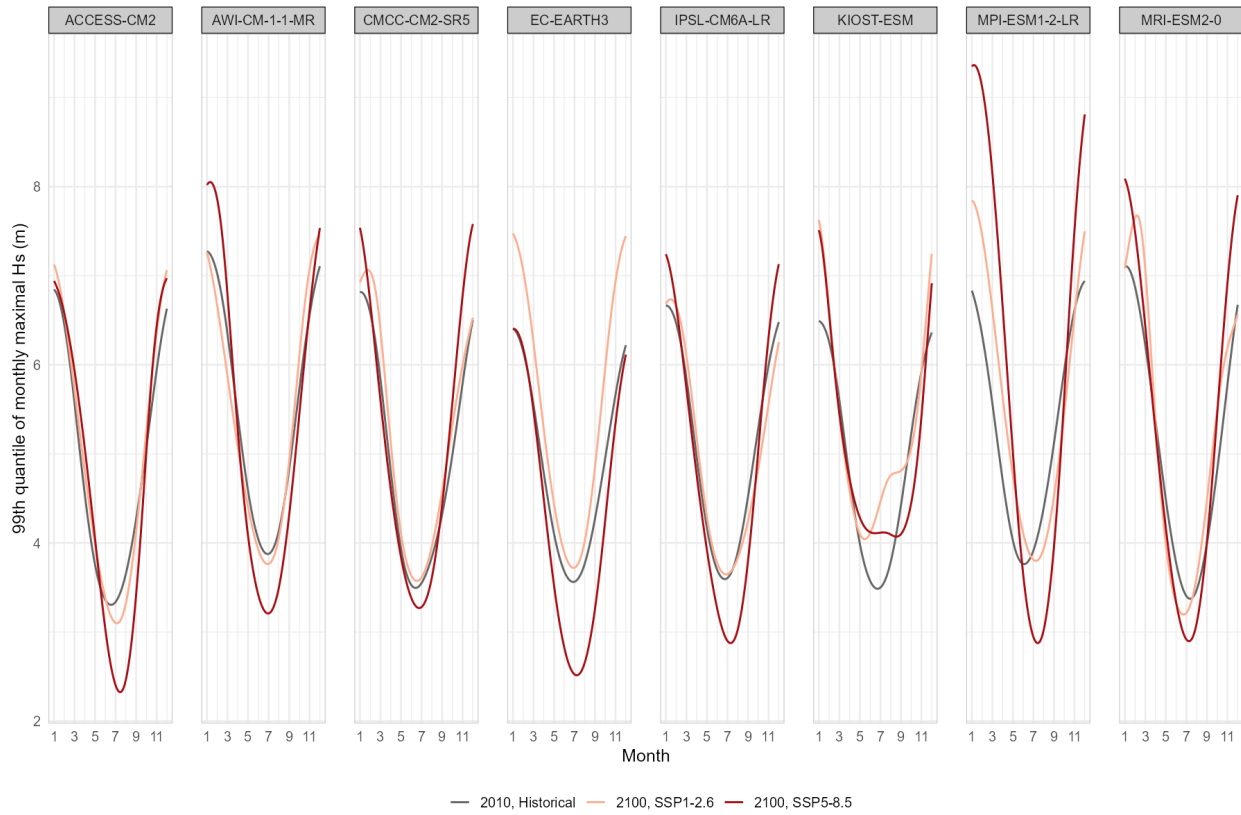

Figure S6: Comparison of monthly 99th quantile, at the West English Channel Representative point, at given years (2010 for Historical run, 2100 for Scenarios SP1-2.6 and SSP5-8.5)

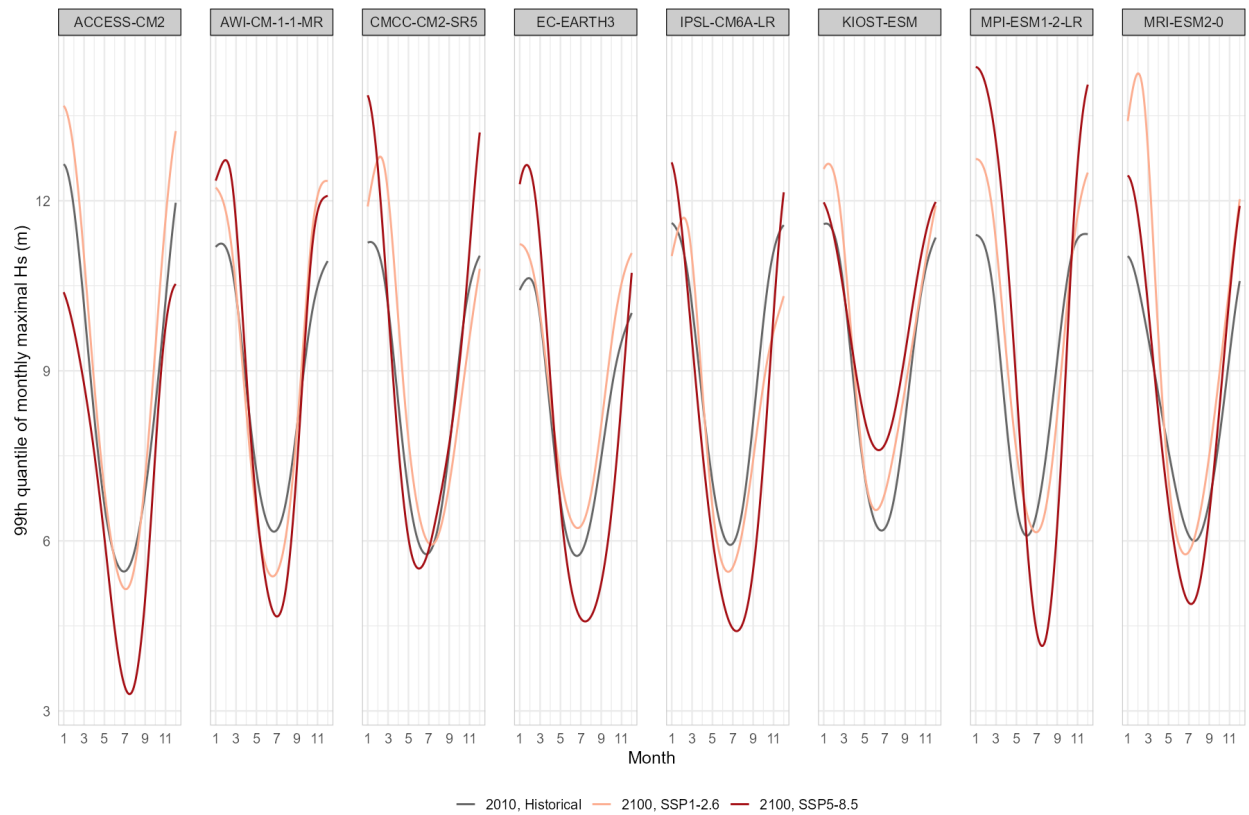

Figure S7: Comparison of monthly 99th quantile, at the North Atlantic Representative point, at given years (2010 for Historical run, 2100 for Scenarios SP1-2.6 and SSP5-8.5)

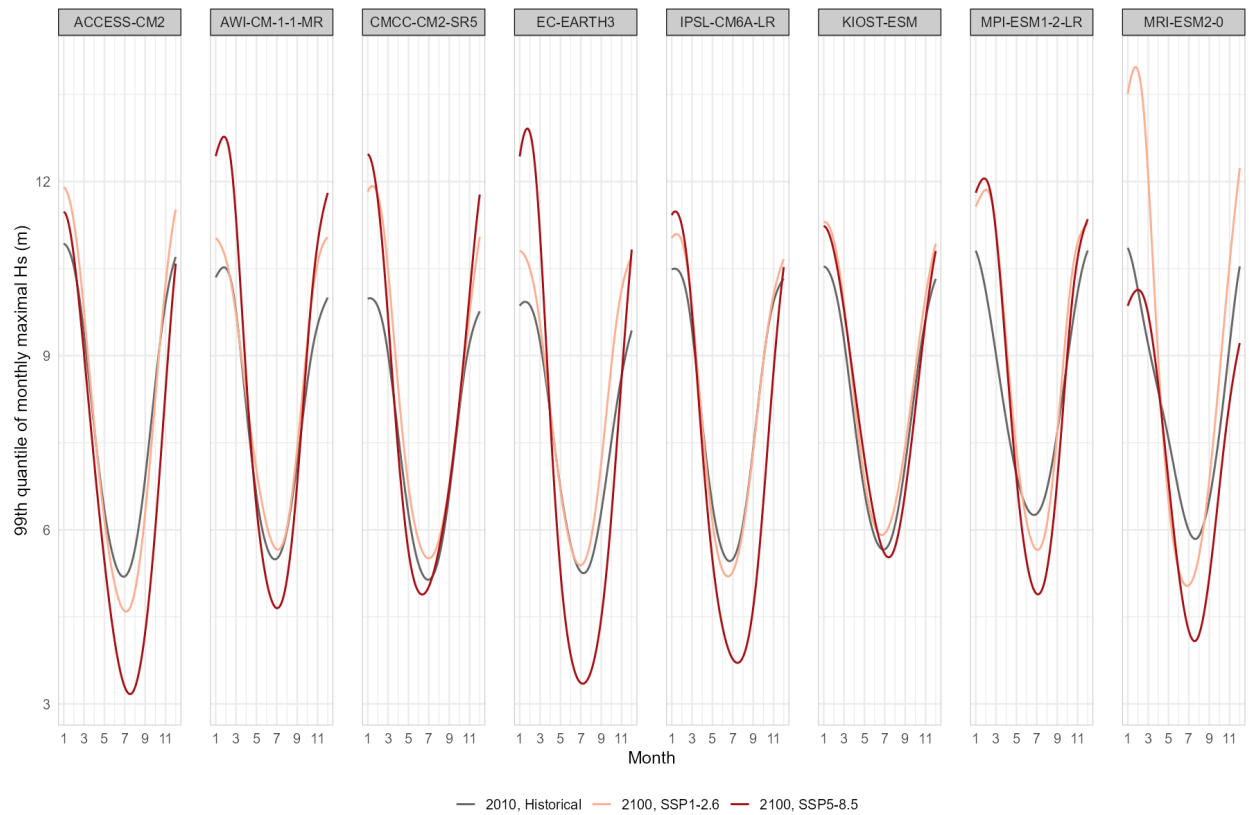

Figure S8: Comparison of monthly 99th quantile, at the South Atlantic Representative point, at given years (2010 for Historical run, 2100 for Scenarios SP1-2.6 and SSP5-8.5)

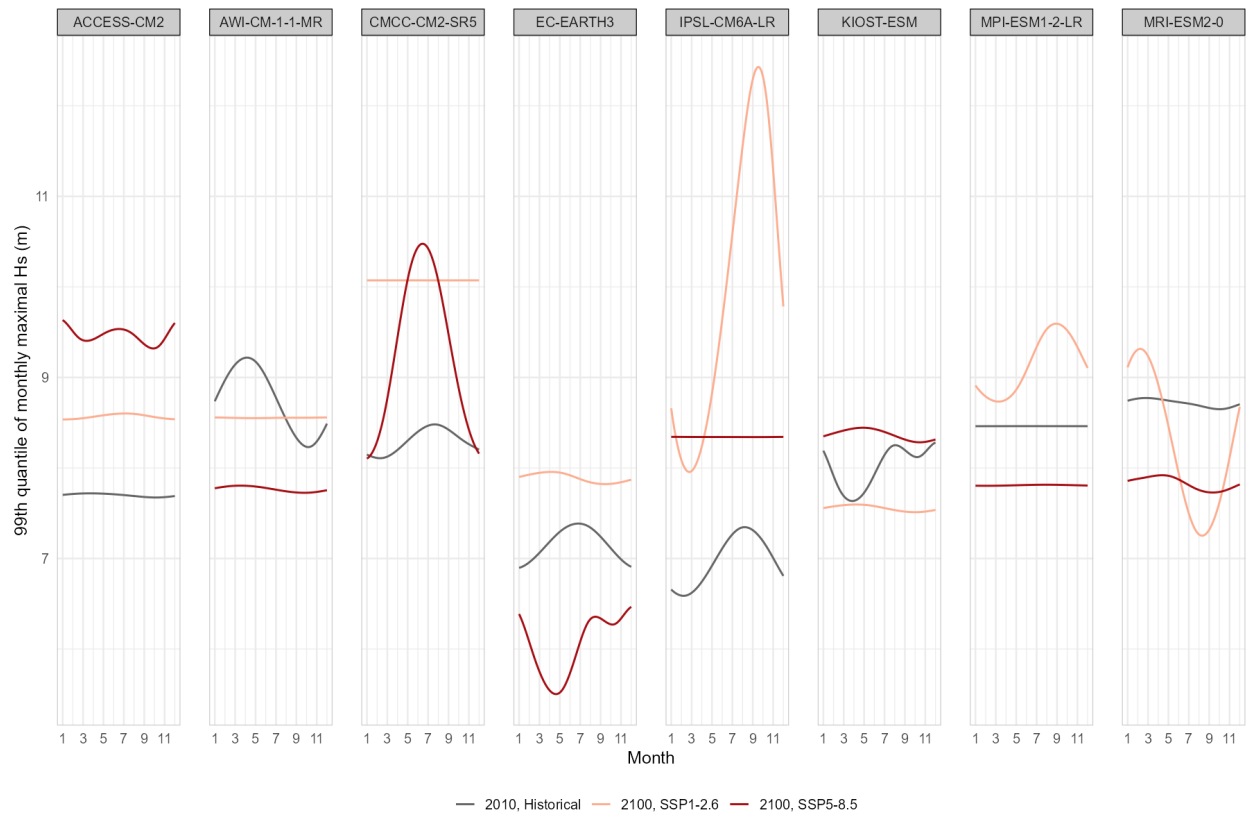

Figure S9: Comparison of monthly 99th quantile, at the West Mediterranean Representative point, at given years (2010 for Historical run, 2100 for Scenarios SP1-2.6 and SSP5-8.5)

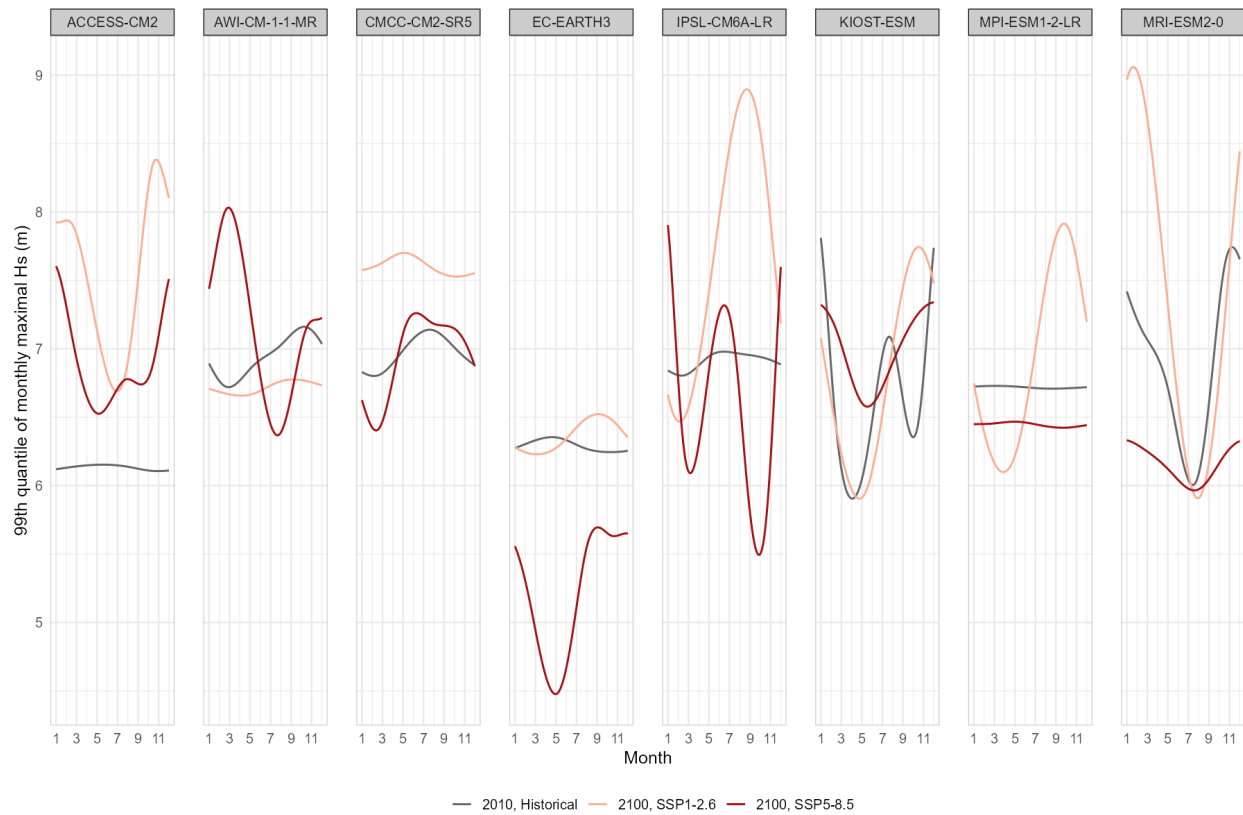

Figure S10: Comparison of monthly 99th quantile, at the East Mediterranean Representative point, at given years (2010 for Historical run, 2100 for Scenarios SP1-2.6 and SSP5-8.5)

### S3 Yearly return levels at the different SRPs

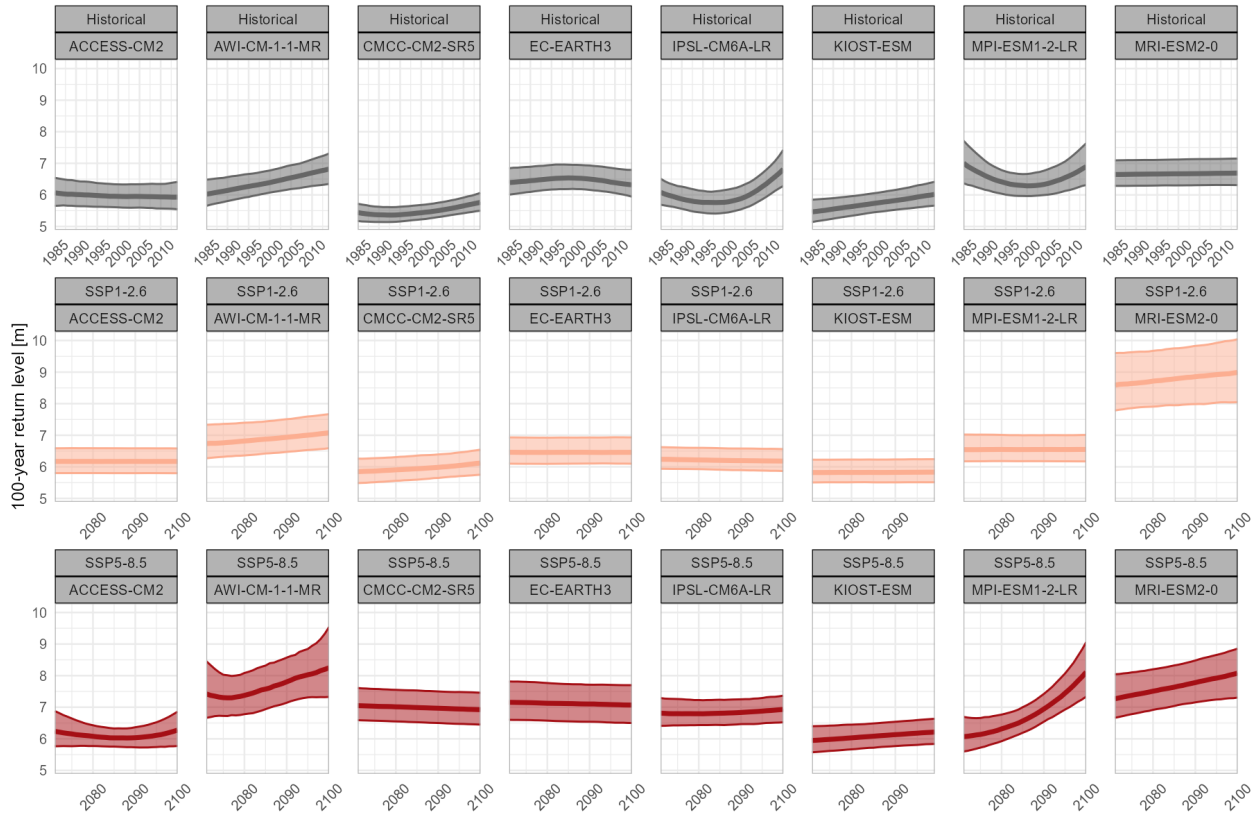

Figure S11: Comparison of yearly return levels, at the East English Channel Representative point

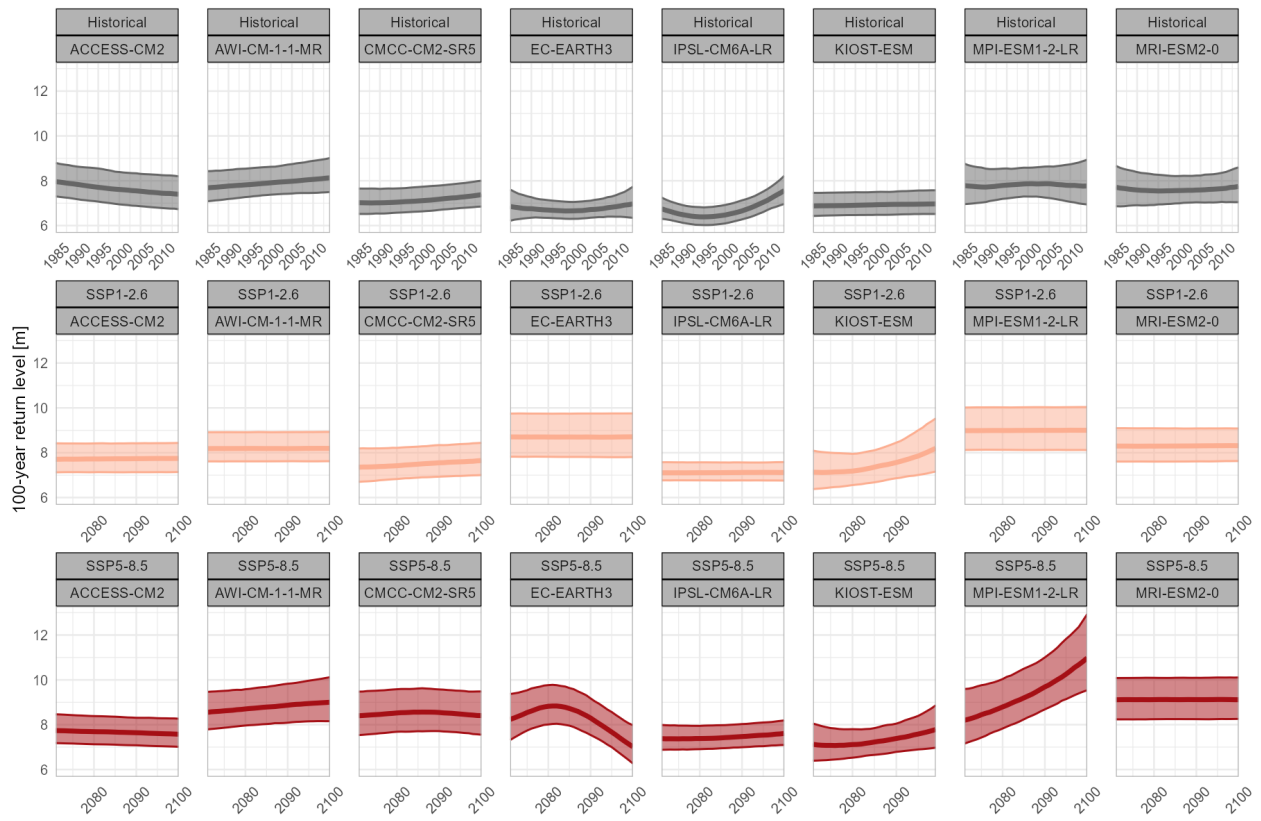

Figure S12: Comparison of yearly return levels, at the West English Channel Representative point

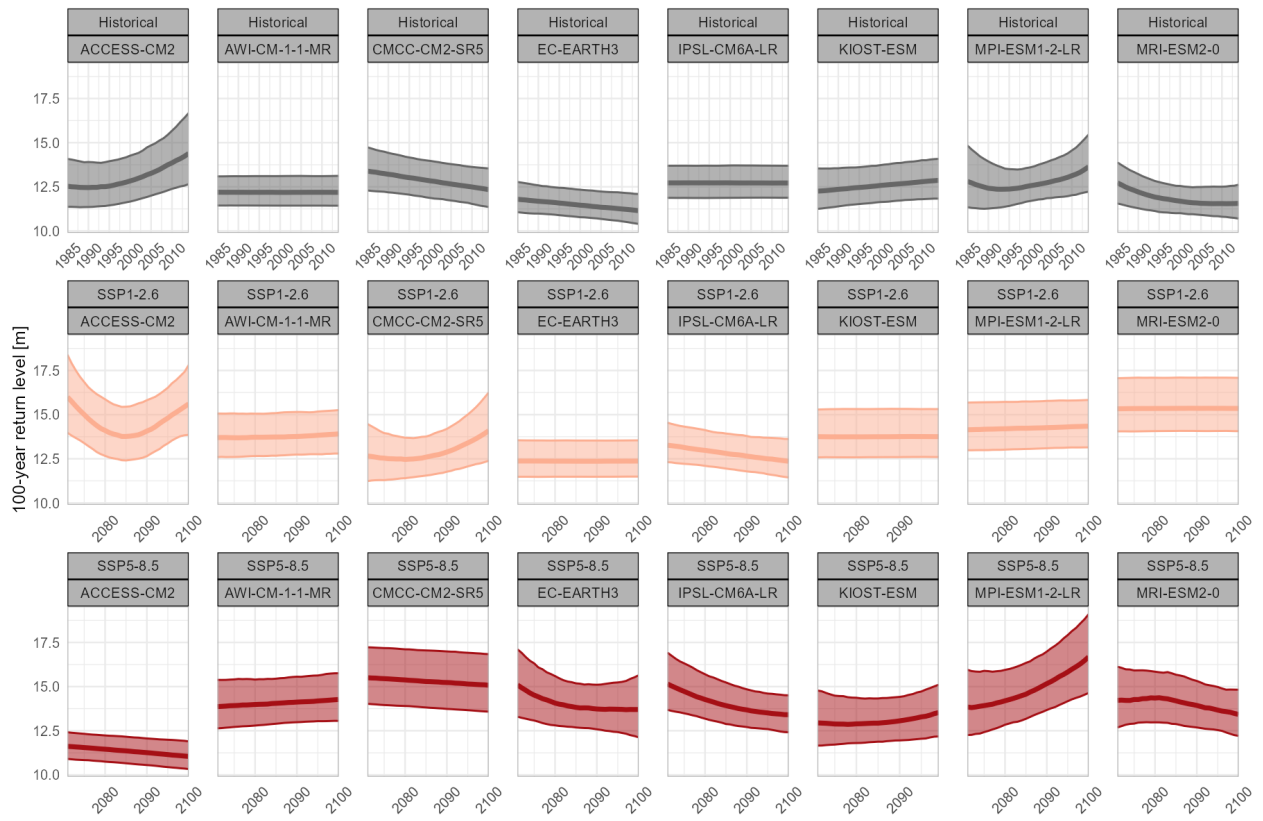

Figure S13: Comparison of yearly return levels, at the North Atlantic Representative point

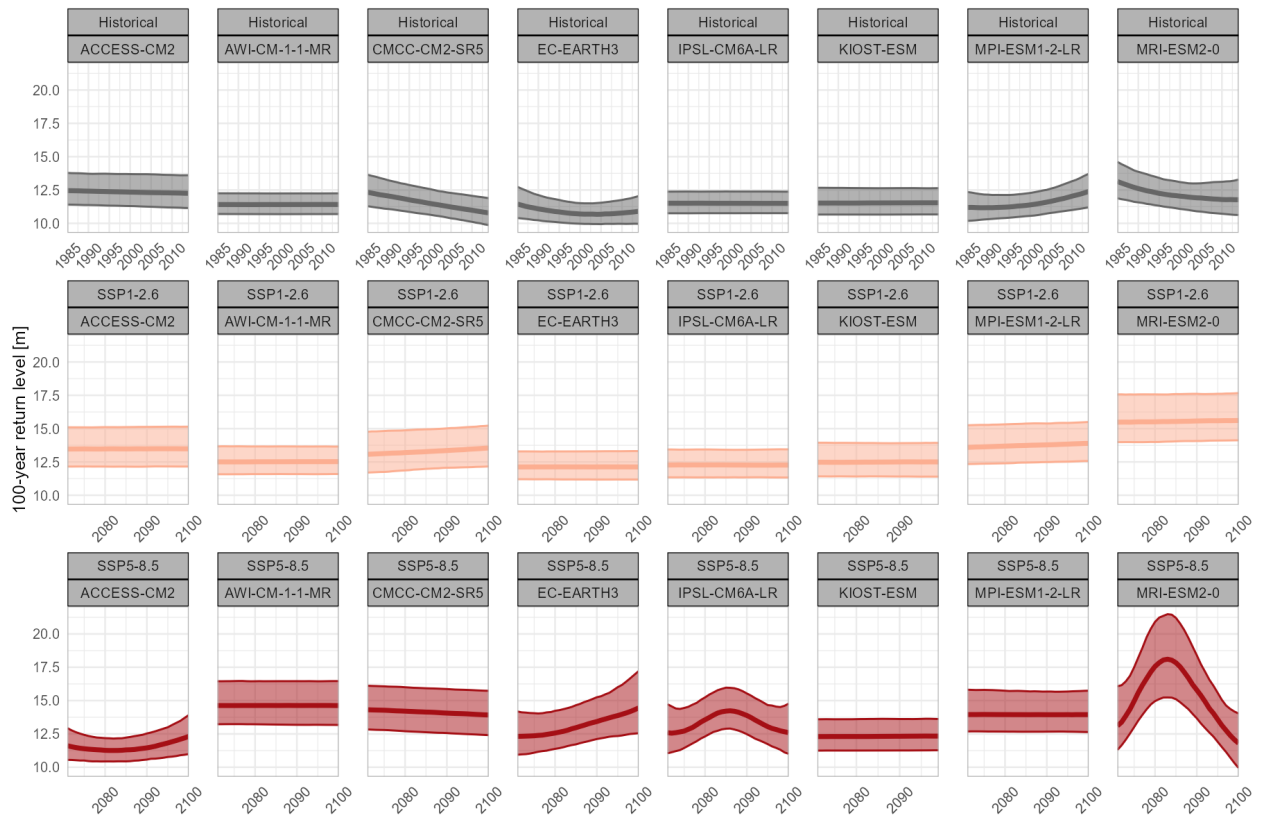

Figure S14: Comparison of yearly return levels, at the South Atlantic Representative point

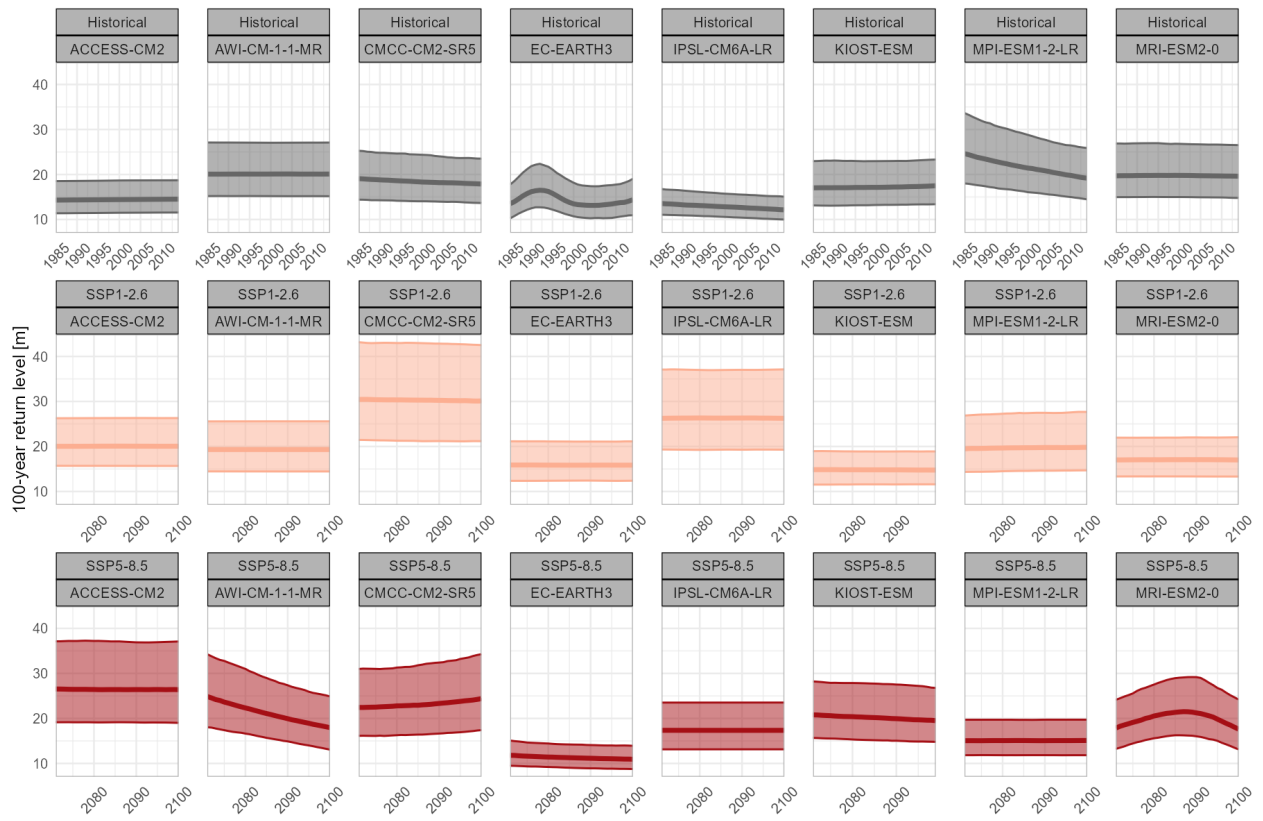

Figure S15: Comparison of yearly return levels, at the West Mediterranean Representative point

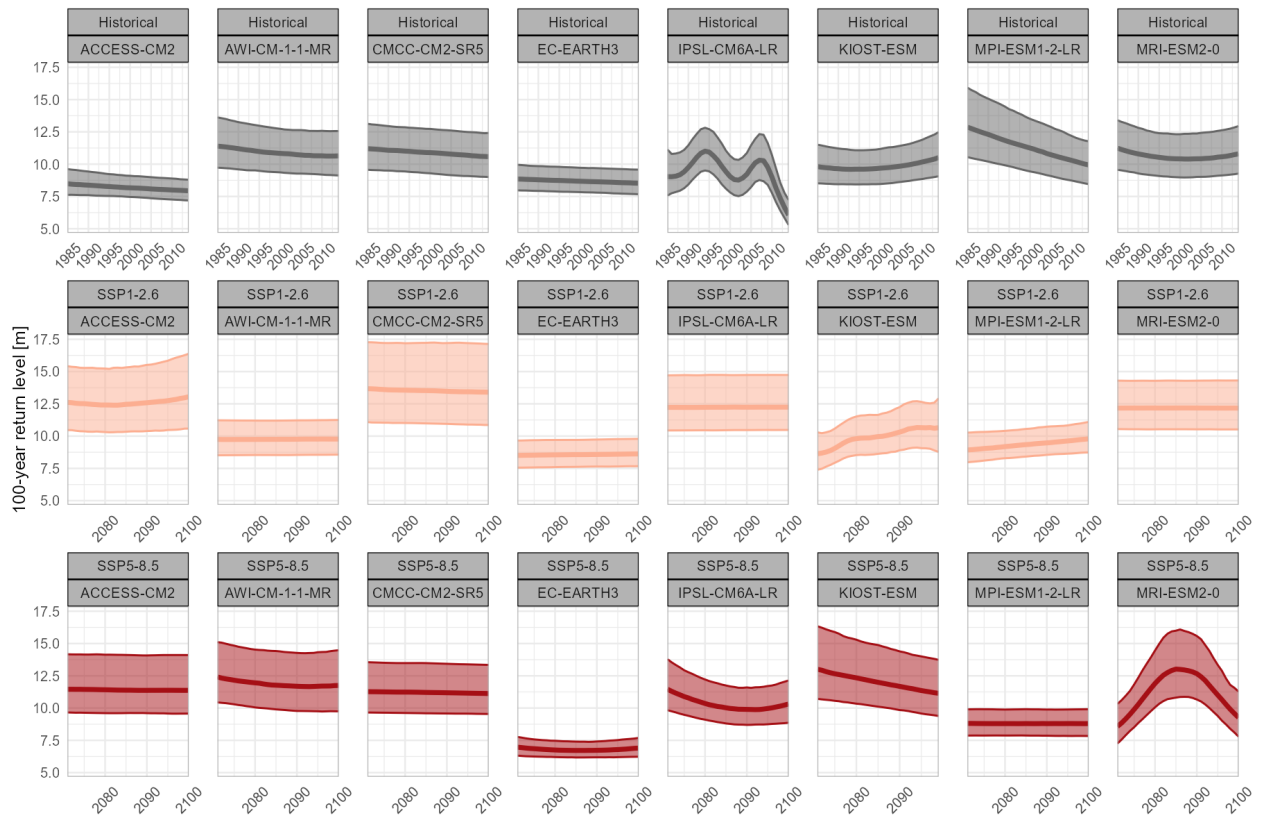

Figure S16: Comparison of yearly return levels, at the East Mediterranean Representative point

## S4 Lifetime design level for each SRPs

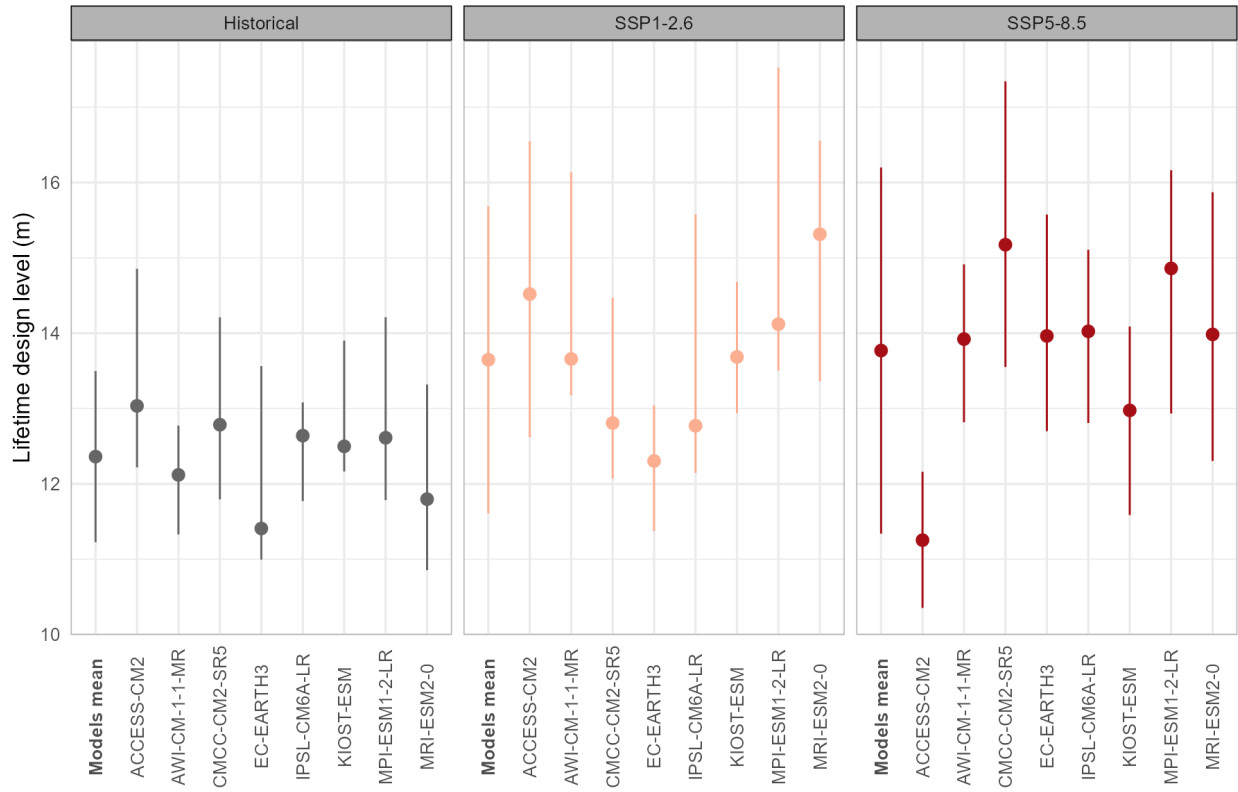

Figure S17: Comparison of yearly return levels, at the North Atlantic Representative point

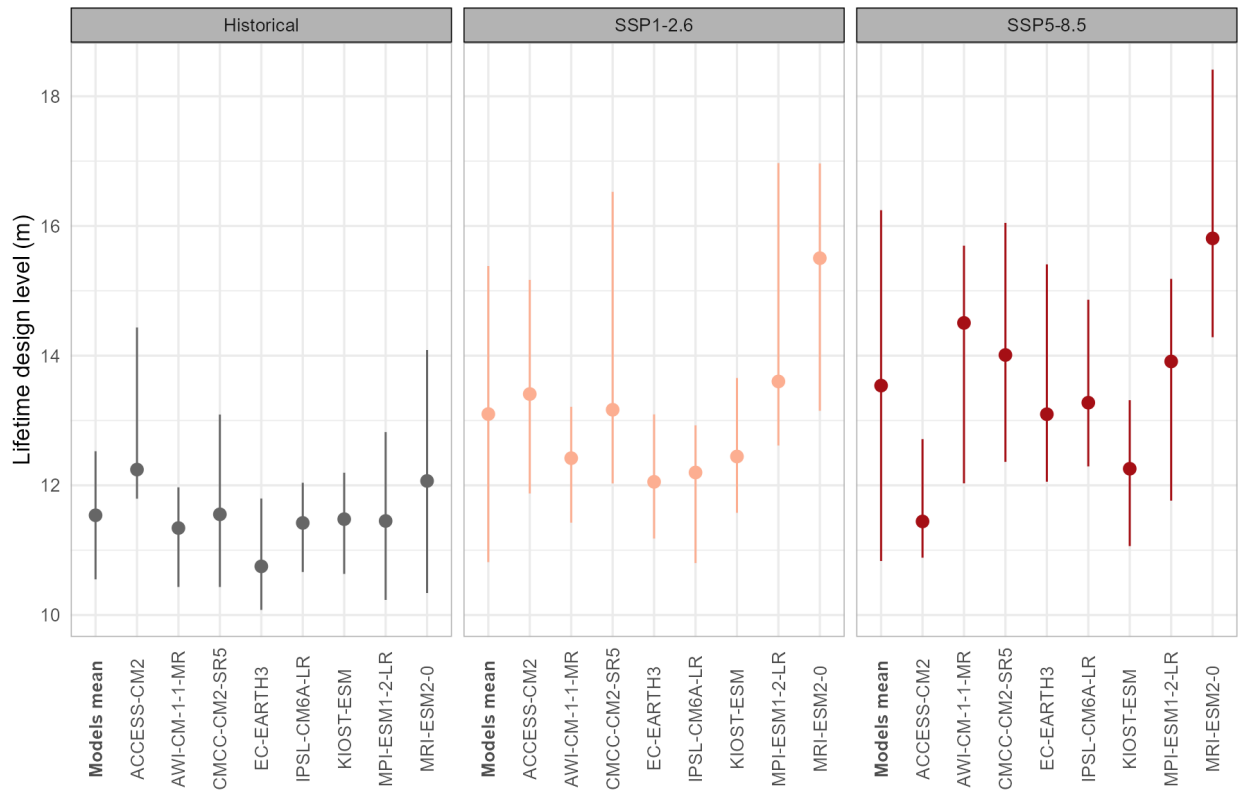

Figure S18: Comparison of yearly return levels, at the South Atlantic Representative point

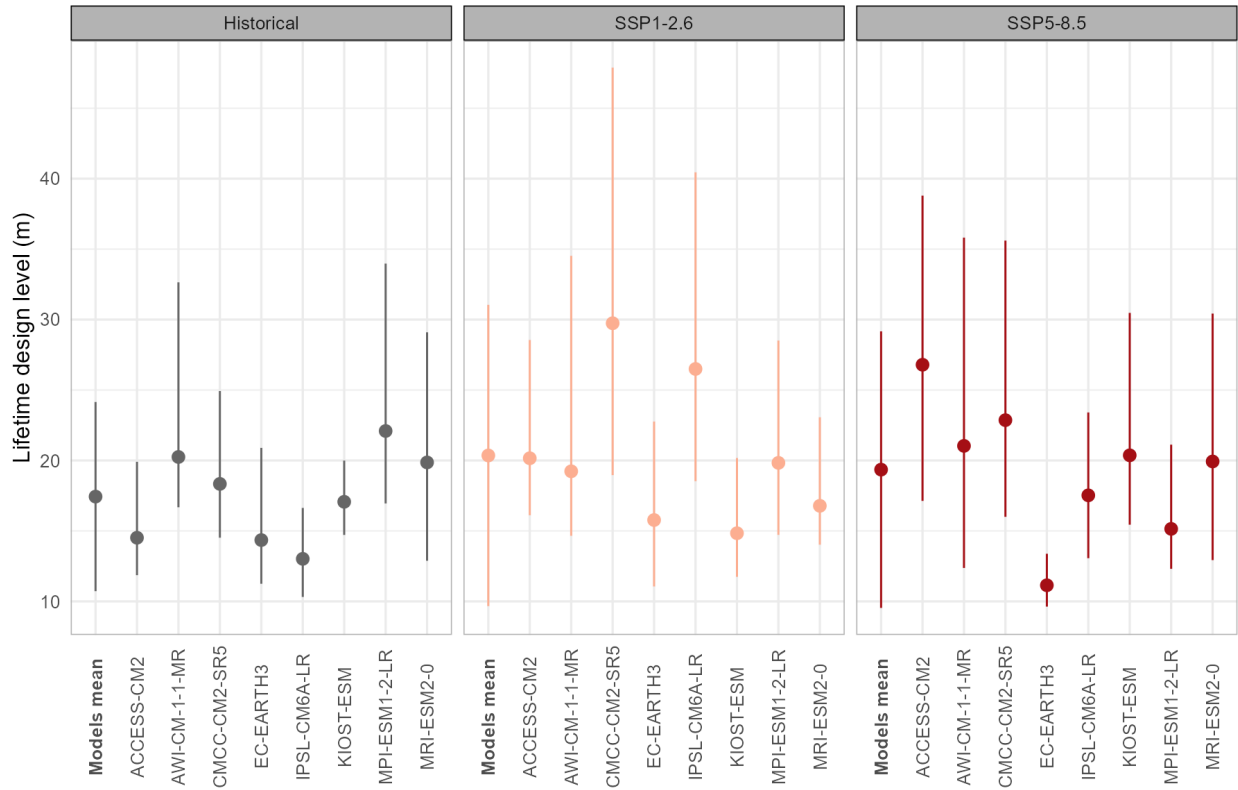

Figure S19: Comparison of yearly return levels, at the West Mediterranean Representative point

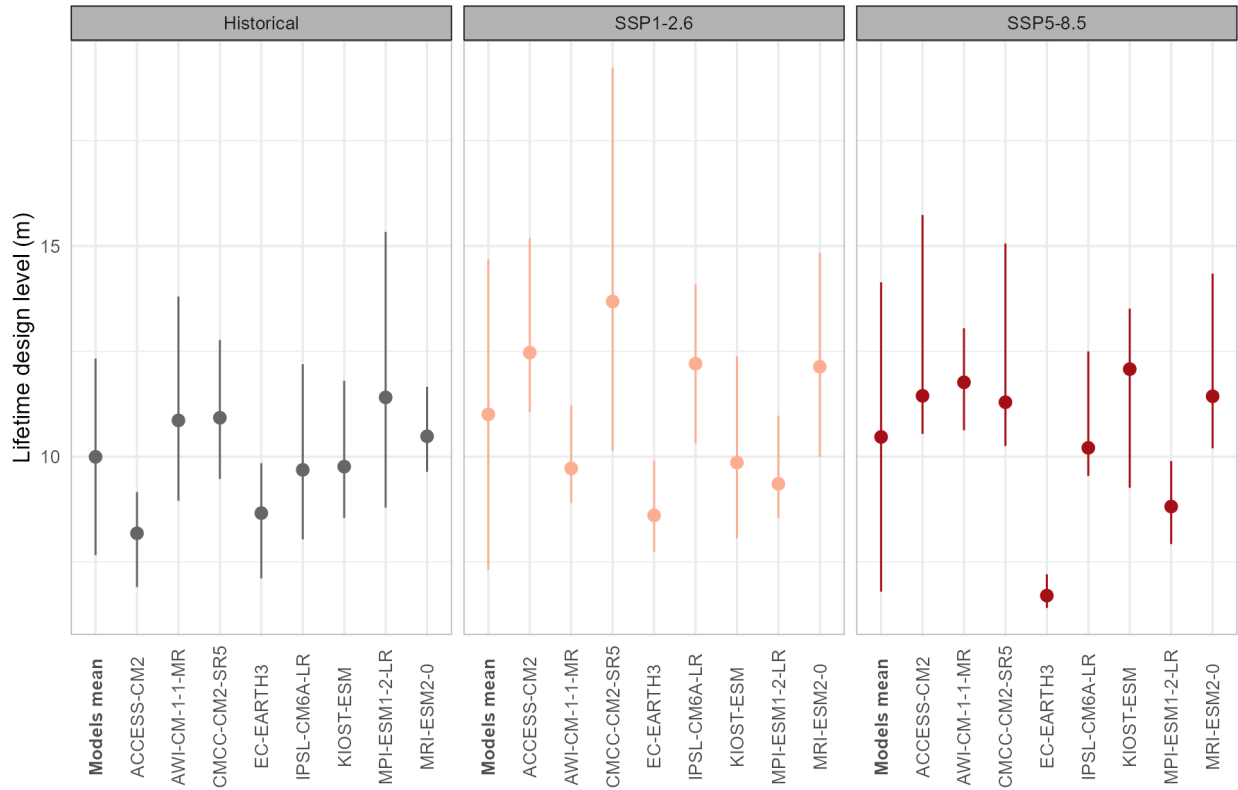

Figure S20: Comparison of yearly return levels, at the East Mediterranean Representative point
